# Supplementary material
Source: bioRxiv or medRxiv preprint supplement (https://www.biorxiv.org/highwire/filestream/13472/field_highwire_adjunct_files/0/049510-1.pdf)
Supplement: Supplementary file [file 049510-1.pdf]

Supplementary Material for:  
Temporal microbiome road-maps guided by perturbations

Beatriz García-Jiménez and Mark D. Wilkinson

Biological Informatics Group  
Center for Plant Biotechnology and Genomics (CBGP), UPM - INIA  
28223 Pozuelo de Alarcón (Madrid), Spain  
beatriz.garcia@upm.es, markw@illuminae.com  
<http://www.wilkinsonlab.info>

# Figure S1: Human gut microbiome sample distribution

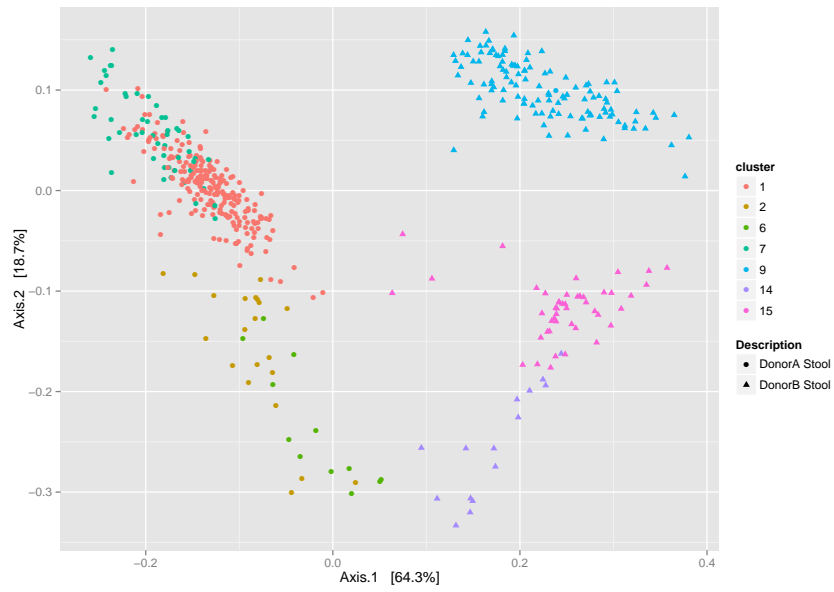

(a) All samples

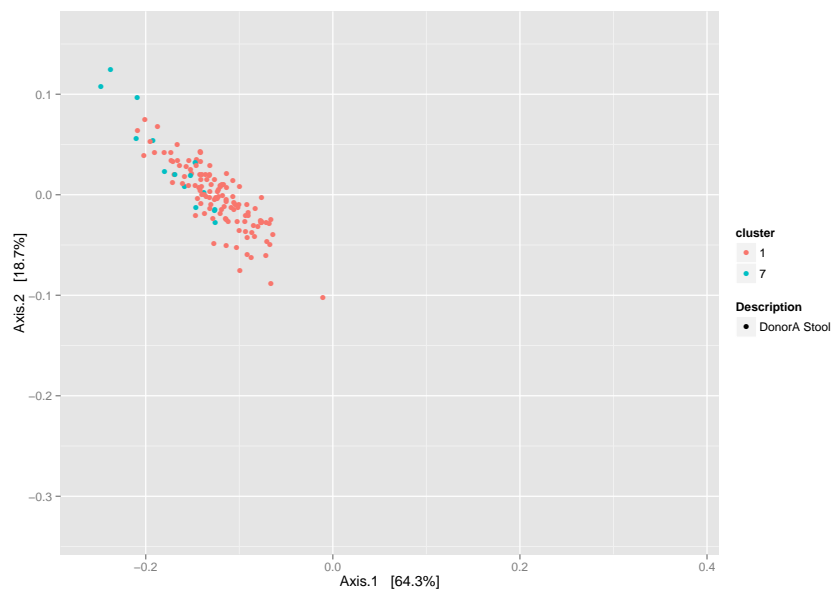

(b) Samples with available perturbations

Figure S1: Sample distribution in clusters from human gut microbiome dataset. Before (a) and after (b) removing samples without perturbations.

**Figure S2: Vaginal flora microbiome sample distribution**

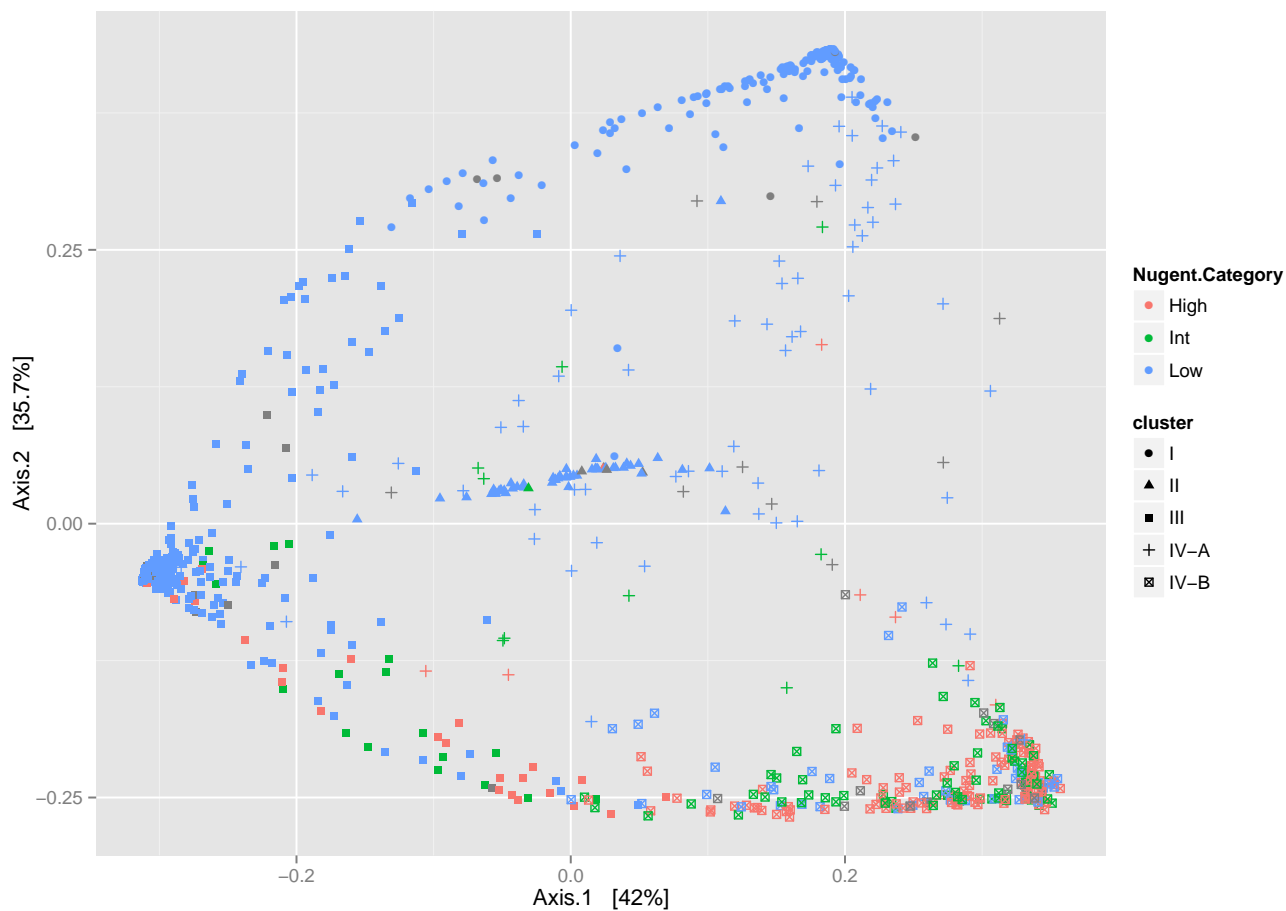

**Figure S2: Sample distribution in clusters from vaginal flora microbiome dataset.** Distribution of Nugent score per sample, being ‘High’ value which indicates the greatest risk for the Bacterial Vaginosis disease, concentrated mainly in cluster IV-B.

# Table S1: transition probabilities in Vaginal flora microbiome dataset

Table S1: Global relative transition probabilities in Vaginal flora microbiome dataset. Input state in rows, output state in columns. Each row sums 1.

| States | I      | II     | III    | IV-A   | IV-B   |
|--------|--------|--------|--------|--------|--------|
| I      | 0.8418 | 0.0000 | 0.0759 | 0.0696 | 0.0127 |
| II     | 0.0000 | 0.8929 | 0.0357 | 0.0714 | 0.0000 |
| III    | 0.0273 | 0.0055 | 0.8579 | 0.0437 | 0.0656 |
| IV-A   | 0.1364 | 0.0341 | 0.1932 | 0.5568 | 0.0795 |
| IV-B   | 0.0127 | 0.0000 | 0.0928 | 0.0169 | 0.8776 |

**Figure S3: Transition diagram vaginal flora microbiom**

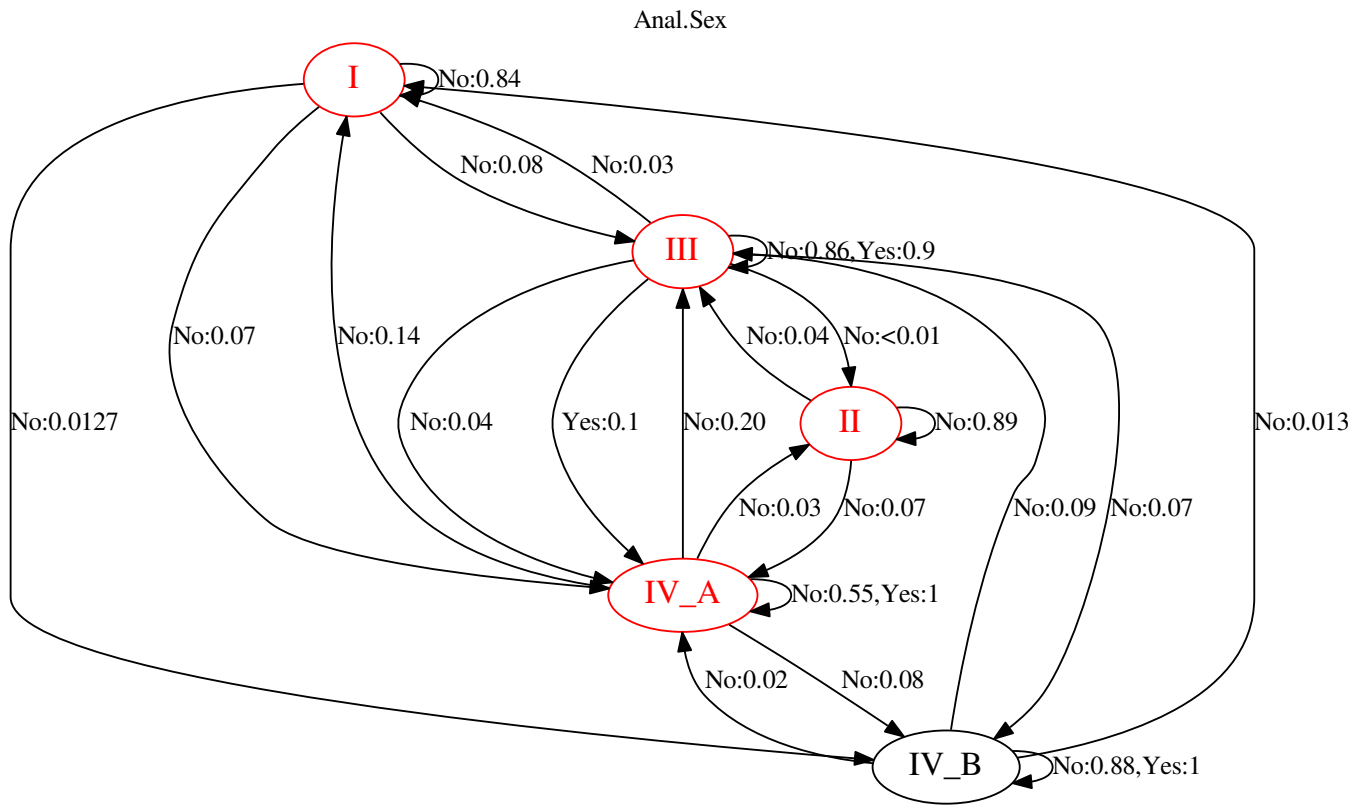

Figure S3: **Transition diagram of vaginal flora microbiome with anal sex as perturbation.** Goal (healthy) states highlighted in red.

## Table S2: Combined MDP policy in Human Gut

Table S2: **Quantity of nutritional intakes to reach *clus7* as the desired microbiome state.** Rows represent external perturbations that could influence the human gut microbiome. Columns represent the microbiome states. In each cell, the policy (low/medium/high) from all Markov systems, one per external perturbation.

| <b>Perturbation \ State</b> | <b><i>clus1</i></b> | <b><i>clus7</i></b> |
|-----------------------------|---------------------|---------------------|
| <b>Calcium</b>              | Medium              | Low                 |
| <b>Calorie</b>              | Low                 | Medium              |
| <b>Carbohydrates</b>        | Medium              | Low                 |
| <b>Cholesterol</b>          | Low                 | Medium              |
| <b>Fat</b>                  | Low                 | Medium              |
| <b>Fiber</b>                | High                | Low                 |
| <b>Protein</b>              | Low                 | Medium              |
| <b>Saturated fat</b>        | Low                 | Medium              |
| <b>Sodium</b>               | Low                 | Medium              |
| <b>Sugar</b>                | High                | High                |
